# 1 Universal temporal rate of DNA 2 replication origin firing: A balance 3 between origin activation and 4 passivation

5 Jean-Michel Arbona<sup>1</sup>, Arach Goldar<sup>2</sup>, Olivier Hyrien<sup>3</sup>, Alain Arneodo<sup>4</sup>, Benjamin  
6 Audit<sup>1</sup>

\*For correspondence:

[benjamin.audit@ens-lyon.fr](mailto:benjamin.audit@ens-lyon.fr) (BA)

7 <sup>1</sup>Univ Lyon, Ens de Lyon, Univ Claude Bernard Lyon 1, CNRS, Laboratoire de Physique,  
8 F-69342 Lyon, France.; <sup>2</sup>Ibitec-S, CEA, Gif-sur-Yvette, France.; <sup>3</sup>Institut de biologie de  
9 l'École normale supérieure (IBENS), École normale supérieure, CNRS, INSERM, PSL  
10 Research University, 75005 Paris, France.; <sup>4</sup>LOMA, Univ de Bordeaux, CNRS, UMR 5798,  
11 351 Cours de la Libération, F-33405 Talence, France.

---

12  
13 **Abstract** The time-dependent rate  $I(t)$  of origin firing per length of unreplicated DNA presents a  
14 universal bell shape in eukaryotes that has been interpreted as the result of a complex  
15 time-evolving interaction between origins and limiting firing factors. Here we show that a normal  
16 diffusion of replication fork components towards localized potential replication origins (*p-oris*) can  
17 more simply account for the  $I(t)$  universal bell shape, as a consequence of a competition between  
18 the origin firing time and the time needed to replicate DNA separating two neighboring *p-ori*. We  
19 predict the  $I(t)$  maximal value to be the product of the replication fork speed with the squared *p-ori*  
20 density. We show that this relation is robustly observed in simulations and in experimental data for  
21 several eukaryotes. Our work underlines that fork-component recycling and potential origins  
22 localization are sufficient spatial ingredients to explain the universality of DNA replication kinetics.

---

## 24 Introduction

25 Eukaryotic DNA replication is a stochastic process (Hyrien *et al.*, 2013; Hawkins *et al.*, 2013; Hyrien,  
26 2016). Prior to entering the S(ynthesis)-phase of the cell cycle, a number of DNA loci called potential  
27 origins (*p-oris*) are *licensed* for DNA replication initiation (Machida *et al.*, 2005; Hyrien *et al.*, 2013;  
28 Hawkins *et al.*, 2013). During S-phase, in response to the presence of origin *firing* factors, pairs  
29 of replication *forks* performing bi-directional DNA synthesis will start from a subset of the *p-oris*,  
30 the active replication origins for that cell cycle (Machida *et al.*, 2005; Hyrien *et al.*, 2013; Hawkins  
31 *et al.*, 2013). Note that the inactivation of *p-oris* by the passing of a replication fork called origin  
32 *passivation*, forbids origin firing in already replicated regions (de Moura *et al.*, 2010; Hyrien and  
33 Goldar, 2010; Yang *et al.*, 2010).

34 The time-dependent rate of origin firing per length of unreplicated DNA,  $I(t)$ , is a fundamental  
35 parameter of DNA replication kinetics.  $I(t)$  curves present a universal bell shape in eukaryotes  
36 (Goldar *et al.*, 2009), increasing toward a maximum after mid-S-phase and decreasing to zero at  
37 the end of S-phase. An increasing  $I(t)$  results in a tight dispersion of replication ending times,  
38 which provides a solution to the random completion problem (Hyrien *et al.*, 2003; Bechhoefer and  
39 Marshall, 2007; Yang and Bechhoefer, 2008).

40 Models of replication in *Xenopus* embryo (Goldar *et al.*, 2008; Gauthier and Bechhoefer, 2009)  
41 proposed that the initial  $I(t)$  increase reflects the progressive import during S-phase of a limiting  
42 origin firing factor and its recycling after release upon forks merge. The  $I(t)$  increase was also  
43 reproduced in a simulation of human genome replication timing that used a constant number of  
44 firing factors having an increasing reactivity through S-phase (Gindin *et al.*, 2014). In these 3 models,  
45 an additional mechanism was required to explain the final  $I(t)$  decrease by either a subdiffusive  
46 motion of the firing factor (Gauthier and Bechhoefer, 2009), a dependency of firing factors' affinity  
47 for  $p$ -oris on replication fork density (Goldar *et al.*, 2008), or an inhomogeneous firing probability  
48 profile (Gindin *et al.*, 2014). Here we show that when taking into account that  $p$ -oris are distributed  
49 at a finite number of localized sites then it is possible to reproduce the universal bell shape of  
50 the  $I(t)$  curves without any additional hypotheses than recycling of fork factor components.  $I(t)$   
51 increases following an increase of fork mergers, each merger releasing a firing factor that was  
52 trapped on DNA. Then  $I(t)$  decreases due to a competition between the time  $t_c$  to fire an origin and  
53 the time  $t_r$  to replicate DNA separating two neighboring  $p$ -ori. We will show that when  $t_c$  becomes  
54 smaller than  $t_r$ ,  $p$ -ori density over unreplicated DNA decreases, and so does  $I(t)$ . Modeling random  
55 localization of active origins in *Xenopus* embryo by assuming that every site is a (weak)  $p$ -ori, previous  
56 work implicitly assumed  $t_r$  to be close to zero (Goldar *et al.*, 2008; Gauthier and Bechhoefer, 2009)  
57 forbidding the observation of a decreasing  $I(t)$ . Licensing of a limited number of sites as  $p$ -ori thus  
58 appears to be a critical property contributing to the observed canceling of  $I(t)$  at the end of S-phase  
59 in all studied eukaryotes.

## 60 Results

### 61 Emergence of a bell-shape $I(t)$

62 In our modeling of replication kinetics, a bimolecular reaction between a firing factor and a  $p$ -ori  
63 results in an origin firing event; then the diffusing element is trapped and travels with the replication  
64 forks until two converging forks merge (termination, Fig. 1 (a)). Under the assumption of a well-  
65 mixed system, for every time step  $dt$ , we consider each interaction between the  $N_{FD}(t)$  free diffusing  
66 firing factors and the  $N_{p-ori}(t)$   $p$ -oris as potentially leading to a firing with a probability  $k_{on}dt$ . The  
67 resulting simulated firing rate per length of unreplicated DNA is then:

$$I_S(t) = \frac{N_{fired}(t, t + dt)}{L_{unrepDNA}(t)dt}, \quad (1)$$

68 where  $N_{fired}(t, t + dt)$  is the number of  $p$ -oris fired between times  $t$  and  $t + dt$ , and  $L_{unrepDNA}(t)$  is  
69 the length of unreplicated DNA a time  $t$ . Then we propagate the forks along the chromosome  
70 with a constant speed  $v$ , and if two forks meet, a free firing factor is released. Finally we simulate  
71 the chromosomes as 1D chains where prior to entering S-phase, the  $p$ -oris are precisely localized.  
72 For *Xenopus* embryo, the  $p$ -ori positions are randomly sampled, so that each simulated S-phase  
73 corresponds to a different positioning of the  $p$ -oris. We compare results obtained with periodic  
74 or uniform  $p$ -ori distributions. For *S. cerevisiae*, the  $p$ -ori positions, identical for each simulation,  
75 are taken from the OriDB database (Siow *et al.*, 2012). As previously simulated in human (Löb  
76 *et al.*, 2016), we model the entry in S-phase using an exponentially relaxed loading of the firing  
77 factors with a time scale shorter than the S-phase duration  $T_{phase}$  (3 mins for *Xenopus* embryo,  
78 where  $T_{phase} \sim 30$  mins, and 10 mins for *S. cerevisiae*, where  $T_{phase} \sim 60$  mins). After the short loading  
79 time, the total number of firing factors  $N_D^T$  is constant. As shown in Fig. 1 (b) (see also Fig. 2), the  
80 universal bell shape of the  $I(t)$  curves (Goldar *et al.*, 2009) spontaneously emerges from our model  
81 when going from weak to strong interaction, and decreasing the number of firing factors below the  
82 number of  $p$ -oris. The details of the firing factor loading dynamics do not affect the emergence of a  
83 bell shaped  $I(t)$ , even though it can modulate its precise shape, especially early in S-phase.

84 In a simple bimolecular context, the rate of origin firing is  $i(t) = k_{on}N_{p-ori}(t)N_{FD}(t)$ . The firing rate  
85 by element of unreplicated DNA is then given by

$$I(t) = k_{on}N_{FD}(t)\rho_{p-ori}(t), \quad (2)$$

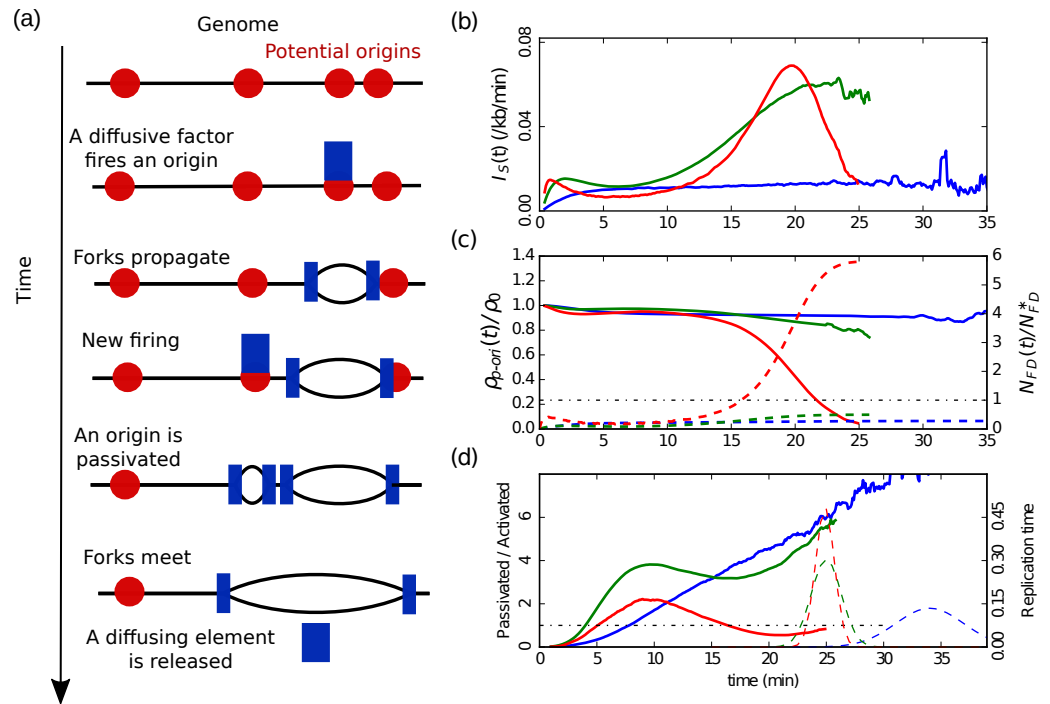

**Figure 1.** (a) Sketch of the different steps of our modeling of replication initiation and propagation. (b)  $I_S(t)$  (Eq. (1)) obtained from numerical simulations of one chromosome of length 3000 kb, with a fork speed  $v = 0.6$  kb/min. The firing factors are loaded with a characteristic time of 3 mins. From blue to green to red the interaction is increased and the number of firing factors is decreased: blue ( $k_{on} = 5 \times 10^{-5} \text{ min}^{-1}$ ,  $N_D^T = 1000$ ,  $\rho_0 = 0.3 \text{ kb}^{-1}$ ), green ( $k_{on} = 6 \times 10^{-4} \text{ min}^{-1}$ ,  $N_D^T = 250$ ,  $\rho_0 = 0.5 \text{ kb}^{-1}$ ), red ( $k_{on} = 6 \times 10^{-3} \text{ min}^{-1}$ ,  $N_D^T = 165$ ,  $\rho_0 = 0.28 \text{ kb}^{-1}$ ). (c) Corresponding normalized densities of  $p$ -ori (solid lines), and corresponding normalized numbers of free diffusing firing factors (dashed line): blue ( $N_{FD}^* = 3360$ ), green ( $N_{FD}^* = 280$ ), red ( $N_{FD}^* = 28$ ); the light blue horizontal dashed line corresponds to the critical threshold value  $N_{FD}(t) = N_{FD}^*$ . (d) Corresponding number of passivated origins over the number of activated origins (solid lines). Corresponding histograms of replication time (dashed lines).

86 where  $\rho_{p\text{-ori}}(t) = N_{p\text{-ori}}(t)/L_{unrepDNA}(t)$ . In the case of a strong interaction and a limited number of  
 87 firing factors, all the diffusing factors react rapidly after loading and  $N_{FD}(t)$  is small (Fig. 1 (c), dashed  
 88 curves). Then follows a stationary phase where as long as the number of  $p$ -ori is high (Fig. 1 (c),  
 89 solid curves), once a diffusing factor is released by the encounter of two forks, it reacts rapidly,  
 90 and so  $N_{FD}(t)$  stays small. Then, when the rate of fork mergers increases due to the fact that  
 91 there are as many active forks but a smaller length of unreplicated DNA, the number of free firing  
 92 factors increases up to  $N_{FD}^T$  at the end of S-phase. As a consequence, the contribution of  $N_{FD}(t)$  to  
 93  $I(t)$  in Eq. (2) can only account for a monotonous increase during the S phase. For  $I(t)$  to reach a  
 94 maximum  $I_{max}$  before the end of S-phase, we thus need that  $\rho_{p\text{-ori}}(t)$  decreases in the late S-phase.  
 95 This happens if the time to fire a  $p$ -ori is shorter than the time to replicate a typical distance between  
 96 two neighboring  $p$ -ori. The characteristic time to fire a  $p$ -ori is  $t_c = 1/k_{on}N_{FD}(t)$ . The mean time for a  
 97 fork to replicate DNA between two neighboring  $p$ -ori is  $t_r = d(t)/v$ , where  $d(t)$  is the mean distance  
 98 between unreplicated  $p$ -ori at time  $t$ . So the density of origins is constant as long as:

$$\frac{d(t)}{v} < \frac{1}{k_{on}N_{FD}(t)}, \quad (3)$$

99 or

$$N_{FD}(t) < N_{FD}^* = \frac{v}{k_{on}d(t)}. \quad (4)$$

100 Thus, at the beginning of the S-phase,  $N_{FD}(t)$  is small,  $\rho_{p\text{-ori}}(t)$  is constant (Fig. 1 (c), solid curves)  
 101 and so  $I_S(t)$  stays small. When  $N_{FD}(t)$  starts increasing, as long as Eq. (4) stays valid,  $I_S(t)$  keeps

102 increasing. When  $N_{FD}(t)$  becomes too large and exceeds  $N_{FD}^*$ , then Eq. (4) is violated and the  
 103 number of  $p$ -oris decreases at a higher rate than the length of unreplicated DNA, and  $\rho_{p-ori}(t)$   
 104 decreases and goes to zero (Fig. 1 (c), red solid curve). As  $N_{FD}(t)$  tends to  $N_D^T$ ,  $I_S(t)$  goes to zero,  
 105 and its global behavior is a bell shape (Fig. 1 (b), red).

106 Let us note that if we decrease the interaction strength ( $k_{on}$ ), then the critical  $N_{FD}^*$  will increase  
 107 beyond  $N_D^T$  (Fig. 1 (c), dashed blue and green curves).  $I_S(t)$  then monotonously increase to reach a  
 108 plateau (Fig. 1 (b), green), or if we decrease further  $k_{on}$ ,  $I_S(t)$  present a very slow increasing behavior  
 109 during the S-phase (Fig. 1 (b), blue). Now if we come back to strong interactions and increase the  
 110 number of firing factors, almost all the  $p$ -oris are fired immediately and  $I_S(t)$  drops to zero after  
 111 firing the last  $p$ -ori.

112 Another way to look at the density of  $p$ -oris is to compute the ratio of the number of passivated  
 113 origins by the number of activated origins (Fig. 1 (d)). After the initial loading of firing factors, this  
 114 ratio is higher than one. For weak and moderate interactions (Fig. 1 (d), blue and green solid curves,  
 115 respectively) this ratio stays bigger than one during all the S-phase, where  $I_S(t)$  was shown to be  
 116 monotonously increasing (Fig. 1 (b)). For a strong interaction (Fig. 1 (b), red solid curve), this ratio  
 117 reaches a maximum and then decreases below one, at a time corresponding to the maximum  
 118 observed in  $I_S(t)$  (Fig. 1 (d), red solid curve). Hence, the maximum of  $I(t)$  corresponds to a switch of  
 119 the balance between origin passivation and activation, the latter becoming predominant in late  
 120 S-phase. We have seen that up to this maximum  $\rho_{p-ori}(t) \approx cte \approx \rho_0$ , so  $I_S(t) \approx k_{on}\rho_0 N_F(t)$ . When  
 121  $N_{FD}(t)$  reaches  $N_{FD}^*$ , then  $I_S(t)$  reaches its maximum value:

$$I_{max} = k_{on}\rho_0 N_{FD}^* \approx \frac{\rho_0 v}{d(t)} \approx v\rho_0^2, \quad (5)$$

122 where we have used the approximation  $d(t) \approx d(0) = 1/\rho_0$  (which is exact for periodically distributed  
 123  $p$ -oris).  $I_{max}$  can thus be predicted from two measurable parameters, providing a direct test of the  
 124 model.

## 125 Comparison with different eukaryotes

126 *Xenopus* embryo. Given the huge size of *Xenopus* embryo chromosomes, to make the simulations  
 127 more easily tractable, we rescaled the size  $L$  of the chromosomes,  $k_{on}$  and  $N_D^T$  to keep the duration  
 128 of S-phase  $T_{phase} \approx L/2vN_D^T$  and  $I(t)$  (Eq. (2)) unchanged ( $L \rightarrow \alpha L$ ,  $N_D^T \rightarrow \alpha N_D^T$ ,  $k_{on} \rightarrow k_{on}/\alpha$ ). In Fig. 2  
 129 (a) are reported the results of our simulations for a chromosome length  $L = 3000$  kb. We see that  
 130 a good agreement is obtained with experimental data (Goldar et al., 2009) when using either a  
 131 uniform distribution of  $p$ -oris with a density  $\rho_0 = 0.70$  kb<sup>-1</sup> and a number of firing factors  $N_D^T = 187$ ,  
 132 or a periodic distribution with  $\rho_0 = 0.28$  kb<sup>-1</sup> and  $N_D^T = 165$ . A higher density of  $p$ -oris was needed for  
 133 uniformly distributed  $p$ -oris where  $d(t)$  (slightly) increases with time, than for periodically distributed  
 134  $p$ -oris where  $d(t)$  fluctuates around a constant value  $1/\rho_0$ . The uniform distribution, which is the  
 135 most natural to simulate *Xenopus* embryo replication, gives a density of activated origins of 0.17 kb<sup>-1</sup>  
 136 in good agreement with DNA combing data analysis (Herrick et al., 2002) but twice lower than  
 137 estimated from real time replication imaging of surface-immobilized DNA in a soluble *Xenopus* egg  
 138 extract system (Loveland et al., 2012).

139 *S. cerevisiae*. To test the robustness of our minimal model with respect to the distribution of  
 140  $p$ -oris, we simulated the replication in *S. cerevisiae*, whose  $p$ -oris are known to be well positioned  
 141 as reported in OriDB (Siow et al., 2012). 829  $p$ -oris were experimentally identified and classified  
 142 into three categories: confirmed origins (410), likely origins (216), and dubious origins (203). When  
 143 comparing the results obtained with our model to the experimental  $I(t)$  data (Goldar et al., 2009)  
 144 (Fig. 2 (b)), we see that to obtain a good agreement we need to consider not only the confirmed  
 145 origins but also the likely and the dubious origins. However in regard to the uncertainty in the  
 146 value of the replication fork velocity and the possible experimental contribution of the  $p$ -oris in  
 147 the rDNA part of chromosome 12 (not taken into account in our modeling), this conclusion needs  
 148 to be confirmed in future experiments. It is to be noted that even if 829  $p$ -oris are needed, on

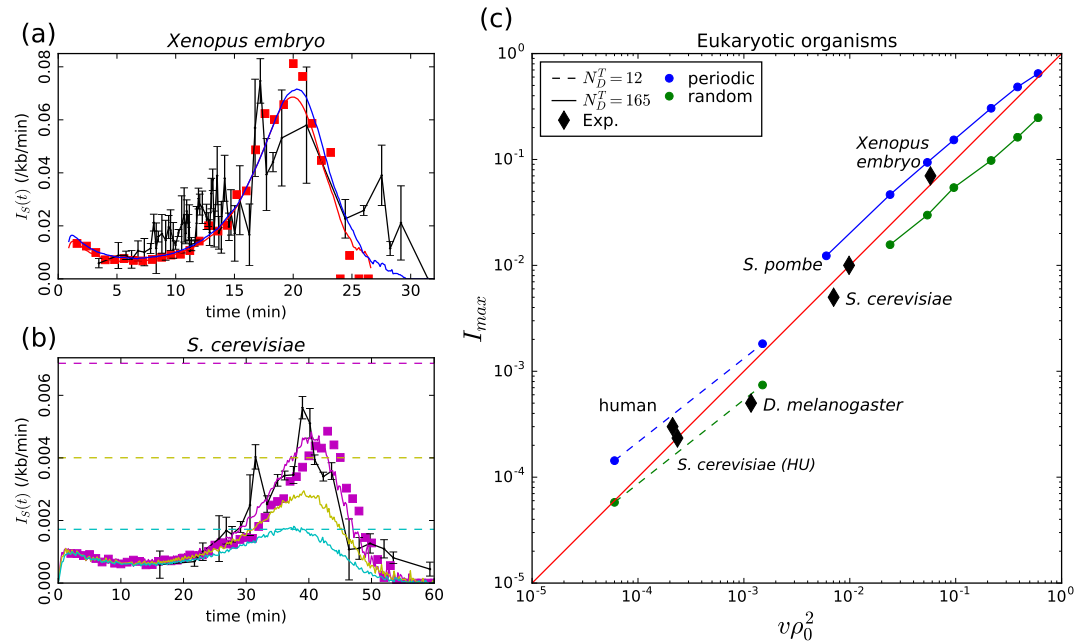

**Figure 2.** (a) *Xenopus* embryo: Simulated  $I_S(t)$  (Eq. (1)) for a chromosome of length  $L = 3000$  kb and a uniform distribution of  $p$ -oris (blue:  $v = 0.6$  kb/min,  $k_{on} = 3. \times 10^{-3}$  min $^{-1}$ ,  $N_D^T = 187$ ,  $\rho_0 = 0.70$  kb $^{-1}$ ) or a periodic distribution of  $p$ -oris (red:  $v = 0.6$  kb/min,  $k_{on} = 6 \times 10^{-3}$  min $^{-1}$ ,  $N_D^T = 165$ ,  $\rho_0 = 0.28$  kb $^{-1}$ ); (red squares) 3D simulations with the same parameter values as for periodic  $p$ -ori distribution; (black) experimental  $I(t)$ : raw data obtained from [Goldar et al. \(2009\)](#) were binned in groups of 4 data points; the mean value and standard error of the mean of each bin were represented. (b) *S. cerevisiae*: Simulated  $I_S(t)$  for the 16 chromosomes with the following parameter values:  $v = 1.5$  kb/min,  $N_D^T = 143$ ,  $k_{on} = 3.6 \times 10^{-3}$  min $^{-1}$ , when considering only confirmed origins (light blue), confirmed and likely origins (yellow) and confirmed, likely and dubious origins (purple); the horizontal dashed lines mark the corresponding predictions for  $I_{max}$  (Eq. (5)); (purple squares) 3D simulations with the same parameter values considering confirmed, likely and dubious origins; (black) experimental  $I(t)$  from [Goldar et al. \(2009\)](#). (c) *Eukaryotic organisms*:  $I_{max}$  as a function of  $v\rho_0^2$ : (squares and bullets) simulations performed for regularly spaced origins (blue) and uniformly distributed origins (green) with two sets of parameter values:  $L = 3000$  kb,  $v = 0.6$  kb/min,  $k_{on} = 1.2 \times 10^{-2}$  min $^{-1}$  and  $N_D^T = 12$  (dashed line) or 165 (solid line); (black diamonds) experimental data points for *Xenopus* embryo, *S. pombe*, *S. cerevisiae*, *S. cerevisiae* grown in Hydroxyurea (HU), *D. melanogaster*, human (see text and Table 1).

149 average only 352 origins have fired by the end of S-phase. For *S. cerevisiae* with well positioned  
 150  $p$ -oris, we have checked the robustness of our results with respect to a stochastic number of firing  
 151 factors  $N_D^T$  from cell to cell (Poisson distribution, [Iyer-Biswas et al. \(2009\)](#)). We confirmed the  $I(t)$   
 152 bell shape with a robust duration of the S-phase of  $58.6 \pm 4.3$  min as compared to  $58.5 \pm 3.3$  min  
 153 obtained previously with a constant number of firing factors. Interestingly, in an experiment where  
 154  $T_{phase}$  was lengthened from 1 h to 16 h by adding hydroxyurea (HU) in yeast growth media, the  
 155 pattern of activation of replication origins was shown to be conserved ([Alvino et al., 2007](#)). HU  
 156 slows down the DNA synthesis to a rate of  $\sim 50$  bp min $^{-1}$  corresponding to a 30 fold decrease  
 157 of the fork speed ([Sogo et al., 2002](#)). In our model with a constant number of firing factors,  
 158  $T_{phase} \sim 1/vN_D^T$ : a two fold increase of the number  $N_D^T$  of firing factors is sufficient to account  
 159 for the 16 fold increase of  $T_{phase}$ , which is thus mainly explained by the HU induced slowdown of  
 160 the replication forks. In a model where the increase of  $I(t)$  results from the import of replication  
 161 factors, the import rate would need to be reduced by the presence of HU in proportion with  
 162 the lengthening of S-phase in order to maintain the pattern of origin activations. Extracting  $I(t)$   
 163 from experimental replication data for cells grown in absence (HU $^-$ ) or presence (HU $^+$ ) ([Alvino](#)  
 164 [et al., 2007](#)), we estimated  $I_{max}^{HU^-} \sim 6.0$  Mb $^{-1}$  min $^{-1}$  and  $I_{max}^{HU^+} \sim 0.24$  Mb $^{-1}$  min $^{-1}$  for HU $^-$  and HU $^+$  cells,  
 165 respectively. The ratio  $I_{max}^{HU^-}/I_{max}^{HU^+} \simeq 24.8 \sim v^{HU^-}/v^{HU^+}$  is quite consistent with the prediction of the

**Table 1.** Experimental data for various eukaryotic organisms with genome length  $L$  (Mb), replication fork velocity  $v$  (kb/min), number of  $p$ -oris ( $N_{p\text{-ori}}(t=0)$ ),  $\rho_0 = N_{p\text{-ori}}(t=0)/L$  (kb<sup>-1</sup>) and  $I_{max}$  (Mb<sup>-1</sup>min<sup>-1</sup>). All  $I_{max}$  data are from [Goldar et al. \(2009\)](#), except for *S. cerevisiae* grown in presence or absence of hydroxyurea (HU) which were computed from the replication profile of [Alvino et al. \(2007\)](#). For *S. cerevisiae* and *S. pombe*, confirmed, likely, and dubious origins were taken into account. For *D. melanogaster*,  $N_{p\text{-ori}}(t=0)$  was obtained from the same Kc cell type as the one used to estimate  $I_{max}$ . For *Xenopus* embryo, we used the experimental density of activated origins to estimate  $N_{p\text{-ori}}(t=0)$  which is probably lower than the true number of  $p$ -oris. For human, we averaged the number of origins experimentally identified in K562 (62971) and in MCF7 (94195) cell lines.

|                                        | $L$    | $v$  | $N_{p\text{-ori}}$ | $\rho_0$ | $I_{max}$ | Ref.                                                                                                                            |
|----------------------------------------|--------|------|--------------------|----------|-----------|---------------------------------------------------------------------------------------------------------------------------------|
| <i>S. cerevisiae</i>                   | 12.5   | 1.60 | 829                | 0.066    | 6.0       | <a href="#">Sekedat et al. (2010)</a> ; <a href="#">Siow et al. (2012)</a>                                                      |
| <i>S. cerevisiae</i> in presence of HU | 12.5   | 0.05 | 829                | 0.066    | 0.24      | <a href="#">Alvino et al. (2007)</a> . Same $N_{p\text{-ori}}$ and $\rho_0$ as <i>S. cerevisiae</i> in normal growth condition. |
| <i>S. pombe</i>                        | 12.5   | 2.80 | 741                | 0.059    | 10.0      | <a href="#">Siow et al. (2012)</a> ; <a href="#">Kaykov and Nurse (2015)</a>                                                    |
| <i>D. melanogaster</i>                 | 143.6  | 0.63 | 6184               | 0.043    | 0.5       | <a href="#">Ananiev et al. (1977)</a> ; <a href="#">Cayrou et al. (2011)</a>                                                    |
| <i>Xenopus</i> embryo                  | 2233.0 | 0.52 | 744333             | 0.333    | 70.0      | <a href="#">Loveland et al. (2012)</a>                                                                                          |
| human                                  | 6469.0 | 1.46 | 78000              | 0.012    | 0.3       | <a href="#">Conti et al. (2007)</a> ; <a href="#">Martin et al. (2011)</a>                                                      |

166 scaling law (Eq. (5)) for a constant density of  $p$ -oris.

167 *D. melanogaster* and human. We gathered from the literature experimental estimates of  $I_{max}$ ,  $\rho_0$   
 168 and  $v$  for different eukaryotic organisms (Table 1). As shown in Fig. 2 (c), when plotting  $I_{max}$  vs  $v\rho_0^2$ ,  
 169 all the experimental data points remarkably follow the diagonal trend indicating the validity of the  
 170 scaling law (Eq. (5)) for all considered eukaryotes. We performed two series of simulations for fixed  
 171 values of parameters  $k_o$ ,  $N_D^T$  and  $v$  and decreasing values of  $\rho_0$  with both periodic distribution (blue)  
 172 and uniform (green) distributions of  $p$ -oris (Fig. 2 (c)). The first set of parameters was chosen to cover  
 173 high  $I_{max}$  values similar the one observed for *Xenopus* embryo (bullets, solid lines). When decreasing  
 174  $\rho_0$ , the number of firing factors becomes too large and  $I(t)$  does no more present a maximum.  
 175 We thus decreased the value of  $N_D^T$  keeping all other parameters constant (boxes, dashed line) to  
 176 explore smaller values of  $I_{max}$  in the range of those observed for human and *D. melanogaster*. We  
 177 can observe that experimental data points' deviation from Eq. (5) is smaller than the deviation due  
 178 to specific  $p$ -oris distributions.

## 179 Discussion

180 To summarize, we have shown that within the framework of 1D nucleation and growth models of  
 181 DNA replication kinetics ([Herrick et al., 2002](#); [Jun and Bechhoefer, 2005](#)), the sufficient conditions  
 182 to obtain a universal bell shaped  $I(t)$  as observed in eukaryotes are a strong bimolecular reaction  
 183 between localized  $p$ -oris and limiting origin firing factors that travel with replication forks and are  
 184 released at termination. Under these conditions, the density of  $p$ -oris naturally decreases by the  
 185 end of the S-phase and so does  $I_S(t)$ . Previous models in *Xenopus* embryo ([Goldar et al., 2008](#);  
 186 [Gauthier and Bechhoefer, 2009](#)) assumed that all sites contained a  $p$ -ori implying that the time  $t$ , to  
 187 replicate DNA between two neighboring  $p$ -oris was close to zero. This clarifies why they needed  
 188 some additional mechanisms to explain the final decrease of the firing rate. Moreover our model  
 189 predicts that the maximum value for  $I(t)$  is intimately related to the density of  $p$ -oris and the fork  
 190 speed (Eq. (5)), and we have shown that without free parameter, this relationship holds for 5 species  
 191 up to a 300 fold difference of  $I_{max}$  and  $v\rho_0^2$  (Table 1, Fig. 2 (c)).

192 In contrast with models where replication kinetics is explained by properties specific to each  
 193  $p$ -oris ([Bechhoefer and Rhind, 2012](#)), our model assumes that all  $p$ -oris are governed by the same  
 194 rule of initiation resulting from physicochemically realistic particulars of their interaction with  
 195 limiting replication firing factors. To confirm this simple physical basis of our modeling, we used  
 196 molecular dynamics rules as previously developed for *S. cerevisiae* ([Arbona et al., 2017](#)) to simulate  
 197 S-phase dynamics of chromosomes confined in a spherical nucleus. We added firing factors that  
 198 are free to diffuse in the covolume left by the chain and that can bind to proximal  $p$ -oris to initiate

199 replication, move along the chromosomes with the replication forks and be released when two  
200 fork merges. As shown in Fig. 2 (a, b) for *Xenopus* embryo and *S. cerevisiae*, results confirmed  
201 the physical relevance of our minimal modeling and the validity of its predictions when the 3D  
202 diffusion of the firing factors is explicitly taken into account. This opens new perspectives for  
203 understanding correlations between firing events along chromosomes that could result in part  
204 from the spatial transport of firing factors. For example in *S. cerevisiae* (Knott *et al.*, 2012) and in *S.*  
205 *pombe* (Kaykov and Nurse, 2015), a higher firing rate has been reported near origins that have just  
206 fired (but see Yang *et al.* (2010)). In mammals, megabase chromosomal regions of synchronous  
207 firing were first observed long ago (Huberman and Riggs, 1968; Hyrien, 2016). Recently, profiling of  
208 replication fork directionality obtained by Okazaki fragment sequencing have suggested that early  
209 firing origins located at the border of Topologically Associating Domains (TADs) trigger a cascade  
210 of secondary initiation events propagating through the TAD (Petryk *et al.*, 2016). Early and late  
211 replicating domains were associated with nuclear compartments of open and closed chromatin  
212 (Ryba *et al.*, 2010; Boulos *et al.*, 2015; Goldar *et al.*, 2016; Hyrien, 2016). In human, replication  
213 timing U-domains (0.1-3 Mb) were shown to correlate with chromosome structural domains (Baker  
214 *et al.*, 2012; Moindrot *et al.*, 2012; Pope *et al.*, 2014) and chromatin loops (Boulos *et al.*, 2013, 2014).

215 Understanding to which extent spatio-temporal correlations of the replication program can  
216 be explained by the diffusion of firing factors in the tertiary chromatin structure specific to each  
217 eukaryotic organism is a challenging issue for future work.

218 We thank F. Argoul for helpful discussions. This work was supported by Institut National  
219 du Cancer (PLBIO16-302), Fondation pour la Recherche Médicale (DEI20151234404) and Agence  
220 National de la Recherche (ANR-15-CE12-0011-01). BA acknowledges support from Science and  
221 Technology Commission of Shanghai Municipality (15520711500) and Joint Research Institute for  
222 Science and Society (JoRISS). We gratefully acknowledge support from the PSMN (Pôle Scientifique  
223 de Modélisation Numérique) of the ENS de Lyon for the computing resources. We thank BioSyL  
224 Federation and Ecofect LabEx (ANR-11-LABX-0048) for inspiring scientific events.

## 225 References

- 226 **Alvino GM**, Collingwood D, Murphy JM, Delrow J, Brewer BJ, Raghuraman MK. Replication in Hydroxyurea: It's a  
227 Matter of Time. *Molecular and Cellular Biology*. 2007 Sep; 27(18):6396–6406. [http://mcb.asm.org/content/27/](http://mcb.asm.org/content/27/18/6396)  
228 [18/6396](http://mcb.asm.org/content/27/18/6396), doi: 10.1128/MCB.00719-07.
- 229 **Ananiev EV**, Polukarova LG, Yurov YB. Replication of chromosomal DNA in diploid *Drosophila melanogaster* cells  
230 cultured in vitro. *Chromosoma*. 1977 Feb; 59:259–272.
- 231 **Arbona JM**, Herbert S, Fabre E, Zimmer C. Inferring the physical properties of yeast chromatin through Bayesian  
232 analysis of whole nucleus simulations. *Genome Biol*. 2017; 18(1):81.
- 233 **Baker A**, Audit B, Chen CL, Moindrot B, Leleu A, Guilbaud G, Rappailles A, Vaillant C, Goldar A, Mongelard  
234 F, d'Aubenton Carafa Y, Hyrien O, Thermes C, Arneodo A. Replication fork polarity gradients revealed  
235 by megabase-sized U-shaped replication timing domains in human cell lines. *PLoS Comput Biol*. 2012;  
236 8(4):e1002443. <http://dx.doi.org/10.1371/journal.pcbi.1002443>, doi: 10.1371/journal.pcbi.1002443.
- 237 **Bechhoefer J**, Rhind N. Replication timing and its emergence from stochastic processes. *Trends Genet*. 2012;  
238 28(8):374–381. doi: 10.1016/j.tig.2012.03.011.
- 239 **Bechhoefer J**, Marshall B. How *Xenopus laevis* replicates DNA reliably even though its origins of replication are  
240 located and initiated stochastically. *Phys Rev Lett*. 2007 Mar; 98:098105. doi: 10.1103/PhysRevLett.98.098105.
- 241 **Boulos RE**, Arneodo A, Jensen P, Audit B. Revealing Long-Range Interconnected Hubs in Human Chromatin  
242 Interaction Data Using Graph Theory. *Phys Rev Lett*. 2013 Sep; 111(11):118102. [https://link.aps.org/doi/10.](https://link.aps.org/doi/10.1103/PhysRevLett.111.118102)  
243 [1103/PhysRevLett.111.118102](https://link.aps.org/doi/10.1103/PhysRevLett.111.118102), doi: 10.1103/PhysRevLett.111.118102.
- 244 **Boulos RE**, Drillon G, Argoul F, Arneodo A, Audit B. Structural organization of human replication timing  
245 domains. *FEBS Lett*. 2015 Oct; 589(20 Pt A):2944–2957. <http://dx.doi.org/10.1016/j.febslet.2015.04.015>, doi:  
246 [10.1016/j.febslet.2015.04.015](http://dx.doi.org/10.1016/j.febslet.2015.04.015).

- 247 **Boulos RE**, Julienne H, Baker A, Chen CL, Petryk N, Kahli M, Yves d'Aubenton-Carafa, Goldar A, Jensen P, Hyrien  
248 O, Thermes C, Arneodo A, Audit B. From the chromatin interaction network to the organization of the human  
249 genome into replication N/U-domains. *New J Phys*. 2014; 16(11):115014. [http://stacks.iop.org/1367-2630/16/](http://stacks.iop.org/1367-2630/16/i=11/a=115014)  
250 [i=11/a=115014](http://stacks.iop.org/1367-2630/16/11/115014), doi: 10.1088/1367-2630/16/11/115014.
- 251 **Cayrou C**, Coulombe P, Vigneron A, Stanojic S, Ganier O, Peiffer I, Rivals E, Puy A, Laurent-Chabalier S, Desprat  
252 R, Méchali M. Genome-scale analysis of metazoan replication origins reveals their organization in specific but  
253 flexible sites defined by conserved features. *Genome Res*. 2011 Sep; 21(9):1438–1449. [http://dx.doi.org/10.](http://dx.doi.org/10.1101/gr.121830.111)  
254 [1101/gr.121830.111](http://dx.doi.org/10.1101/gr.121830.111), doi: 10.1101/gr.121830.111.
- 255 **Conti C**, Sacca B, Herrick J, Lalou C, Pommier Y, Bensimon A. Replication fork velocities at adjacent replication  
256 origins are coordinately modified during DNA replication in human cells. *Mol Biol Cell*. 2007 Aug; 18(8):3059–  
257 3067. <http://dx.doi.org/10.1091/mbc.E06-08-0689>, doi: 10.1091/mbc.E06-08-0689.
- 258 **Gauthier MG**, Bechhoefer J. Control of DNA replication by anomalous reaction-diffusion kinetics. *Phys Rev Lett*.  
259 2009 Apr; 102:158104. doi: 10.1103/PhysRevLett.102.158104.
- 260 **Gindin Y**, Valenzuela MS, Aladjem MI, Meltzer PS, Bilke S. A chromatin structure-based model accurately predicts  
261 DNA replication timing in human cells. *Mol Syst Biol*. 2014; 10:722.
- 262 **Goldar A**, Arneodo A, Audit B, Argoul F, Rappailles A, Guilbaud G, Petryk N, Kahli M, Hyrien O. Deciphering DNA  
263 replication dynamics in eukaryotic cell populations in relation with their averaged chromatin conformations.  
264 *Sci Rep*. 2016 Mar; 6:22469. <http://www.nature.com/srep/2016/160303/srep22469/full/srep22469.html>, doi:  
265 10.1038/srep22469.
- 266 **Goldar A**, Labit H, Marheineke K, Hyrien O. A dynamic stochastic model for DNA replication initiation in early  
267 embryos. *PLoS One*. 2008; 3(8):e2919. <http://dx.doi.org/10.1371/journal.pone.0002919>, doi: 10.1371/jour-  
268 [nal.pone.0002919](http://dx.doi.org/10.1371/journal.pone.0002919).
- 269 **Goldar A**, Marsolier-Kergoat MC, Hyrien O. Universal temporal profile of replication origin activation in eu-  
270 karyotes. *PLoS One*. 2009; 4(6):e5899. <http://dx.doi.org/10.1371/journal.pone.0005899>, doi: 10.1371/jour-  
271 [nal.pone.0005899](http://dx.doi.org/10.1371/journal.pone.0005899).
- 272 **Hawkins M**, Retkute R, Müller CA, Saner N, Tanaka TU, de Moura APS, Nieduszynski CA. High-resolution  
273 replication profiles define the stochastic nature of genome replication initiation and termination. *Cell Rep*.  
274 2013 Nov; 5:1132–1141. doi: 10.1016/j.celrep.2013.10.014.
- 275 **Herrick J**, Jun S, Bechhoefer J, Bensimon A. Kinetic model of DNA replication in eukaryotic organisms. *J Mol Biol*.  
276 2002 Jul; 320:741–750.
- 277 **Huberman JA**, Riggs AD. On the mechanism of DNA replication in mammalian chromosomes. *J Mol Biol*. 1968  
278 Mar; 32(2):327–341. <http://www.sciencedirect.com/science/article/pii/0022283668900132>, doi: 10.1016/0022-  
279 2836(68)90013-2.
- 280 **Hyrien O**. Up and Down the Slope: Replication Timing and Fork Directionality Gradients in Eukaryotic Genomes.  
281 In: Kaplan DL, editor. *The Initiation of DNA Replication in Eukaryotes* Switzerland: Springer International  
282 Publishing; 2016.p. 65–85.
- 283 **Hyrien O**, Goldar A. Mathematical modelling of eukaryotic DNA replication. *Chromosome Res*. 2010; 18(1):147–  
284 161.
- 285 **Hyrien O**, Marheineke K, Goldar A. Paradoxes of eukaryotic DNA replication: MCM proteins and the random  
286 completion problem. *BioEssays*. 2003 Feb; 25(2):116–125. [http://onlinelibrary.wiley.com/doi/10.1002/bies.](http://onlinelibrary.wiley.com/doi/10.1002/bies.10208/abstract)  
287 [10208/abstract](http://onlinelibrary.wiley.com/doi/10.1002/bies.10208/abstract), doi: 10.1002/bies.10208.
- 288 **Hyrien O**, Rappailles A, Guilbaud G, Baker A, Chen CL, Goldar A, Petryk N, Kahli M, Ma E, d'Aubenton Carafa Y, Au-  
289 dit B, Thermes C, Arneodo A. From Simple Bacterial and Archaeal Replicons to Replication N/U-Domains. *J Mol*  
290 *Biol*. 2013 Nov; 425(23):4673–4689. <http://www.sciencedirect.com/science/article/pii/S0022283613006050>,  
291 doi: 10.1016/j.jmb.2013.09.021.
- 292 **Iyer-Biswas S**, Hayot F, Jayaprakash C. Stochasticity of gene products from transcriptional pulsing. *Phys*  
293 *Rev E*. 2009 Mar; 79(3):031911. <https://link.aps.org/doi/10.1103/PhysRevE.79.031911>, doi: 10.1103/Phys-  
294 [RevE.79.031911](https://link.aps.org/doi/10.1103/PhysRevE.79.031911).
- 295 **Jun S**, Bechhoefer J. Nucleation and growth in one dimension. II. Application to DNA replication kinetics. *Phys*  
296 *Rev E*. 2005; 71:011909. doi: 10.1103/PhysRevE.71.011909.



- 297 **Kaykov A**, Nurse P. The spatial and temporal organization of origin firing during the S-phase of fission yeast.  
298 *Genome Res.* 2015 Mar; 25:391–401. doi: [10.1101/gr.180372.114](https://doi.org/10.1101/gr.180372.114).
- 299 **Knott SRV**, Peace JM, Ostrow AZ, Gan Y, Rex AE, Viggiani CJ, Tavaré S, Aparicio OM. Forkhead transcription  
300 factors establish origin timing and long-range clustering in *S. cerevisiae*. *Cell.* 2012 Jan; 148:99–111. doi:  
301 [10.1016/j.cell.2011.12.012](https://doi.org/10.1016/j.cell.2011.12.012).
- 302 **Löb D**, Lengert N, Chagin VO, Reinhart M, Casas-Delucchi CS, Cardoso MC, Drossel B. 3D replicon distributions  
303 arise from stochastic initiation and domino-like DNA replication progression. *Nat Commun.* 2016 Apr; 7:11207.  
304 doi: [10.1038/ncomms11207](https://doi.org/10.1038/ncomms11207).
- 305 **Loveland AB**, Habuchi S, Walter JC, van Oijen AM. A general approach to break the concentration barrier in  
306 single-molecule imaging. *Nat Methods.* 2012 Oct; 9:987–992. doi: [10.1038/nmeth.2174](https://doi.org/10.1038/nmeth.2174).
- 307 **Machida YJ**, Hamlin JL, Dutta A. Right place, right time, and only once: replication initiation in metazoans. *Cell.*  
308 2005 Oct; 123(1):13–24. <http://dx.doi.org/10.1016/j.cell.2005.09.019>, doi: [10.1016/j.cell.2005.09.019](https://doi.org/10.1016/j.cell.2005.09.019).
- 309 **Martin MM**, Ryan M, Kim R, Zakas AL, Fu H, Lin CM, Reinhold WC, Davis SR, Bilke S, Liu H, Doroshov JH, Reimers  
310 MA, Valenzuela MS, Pommier Y, Meltzer PS, Aladjem MI. Genome-wide depletion of replication initiation  
311 events in highly transcribed regions. *Genome Res.* 2011 Nov; 21:1822–1832. doi: [10.1101/gr.124644.111](https://doi.org/10.1101/gr.124644.111).
- 312 **Moindrot B**, Audit B, Klous P, Baker A, Thermes C, de Laat W, Bouvet P, Mongelard F, Arneodo A.  
313 3D chromatin conformation correlates with replication timing and is conserved in resting cells. *Nu-  
314 cleic Acids Res.* 2012 Oct; 40(19):9470–9481. [https://academic.oup.com/nar/article/40/19/9470/2414837/  
315 3D-chromatin-conformation-correlates-with](https://academic.oup.com/nar/article/40/19/9470/2414837/3D-chromatin-conformation-correlates-with), doi: [10.1093/nar/gks736](https://doi.org/10.1093/nar/gks736).
- 316 **de Moura AP**, Retkute R, Hawkins M, Nieduszynski CA. Mathematical modelling of whole chromosome replica-  
317 tion. *Nucleic Acids Res.* 2010; 38(17):5623–5633.
- 318 **Petryk N**, Kahli M, d'Aubenton Carafa Y, Jaszczyszyn Y, Shen Y, Silvain M, Thermes C, Chen CL, Hyrien O.  
319 Replication landscape of the human genome. *Nat Commun.* 2016 Jan; 7:10208. [http://www.nature.com/  
320 ncomms/2016/160111/ncomms10208/full/ncomms10208.html](http://www.nature.com/ncomms/2016/160111/ncomms10208/full/ncomms10208.html), doi: [10.1038/ncomms10208](https://doi.org/10.1038/ncomms10208).
- 321 **Pope BD**, Ryba T, Dileep V, Yue F, Wu W, Denas O, Vera DL, Wang Y, Hansen RS, Canfield TK, Thurman RE,  
322 Cheng Y, Gülsoy G, Dennis JH, Snyder MP, Stamatoyannopoulos JA, Taylor J, Hardison RC, Kahveci T, Ren B,  
323 et al. Topologically-associating domains are stable units of replication-timing regulation. *Nature.* 2014 Nov;  
324 515(7527):402–405. <http://www.ncbi.nlm.nih.gov/pmc/articles/PMC4251741/>, doi: [10.1038/nature13986](https://doi.org/10.1038/nature13986).
- 325 **Ryba T**, Hiratani I, Lu J, Itoh M, Kulik M, Zhang J, Schulz TC, Robins AJ, Dalton S, Gilbert DM. Evolutionarily  
326 conserved replication timing profiles predict long-range chromatin interactions and distinguish closely  
327 related cell types. *Genome Res.* 2010 Jun; 20(6):761–770. <http://dx.doi.org/10.1101/gr.099655.109>, doi:  
328 [10.1101/gr.099655.109](https://doi.org/10.1101/gr.099655.109).
- 329 **Sekedat MD**, Fenyö D, Rogers RS, Tackett AJ, Aitchison JD, Chait BT. GINS motion reveals replication fork progres-  
330 sion is remarkably uniform throughout the yeast genome. *Mol Syst Biol.* 2010; 6:353. doi: [10.1038/msb.2010.8](https://doi.org/10.1038/msb.2010.8).
- 331 **Siow CC**, Nieduszynska SR, Müller CA, Nieduszynski CA. OriDB, the DNA replication origin database updated  
332 and extended. *Nucleic Acids Res.* 2012 Jan; 40:D682–D686. doi: [10.1093/nar/gkr1091](https://doi.org/10.1093/nar/gkr1091).
- 333 **Sogo JM**, Lopes M, Foiani M. Fork reversal and ssDNA accumulation at stalled replication forks owing to  
334 checkpoint defects. *Science.* 2002; 297(5581):599–602. doi: [10.1126/science.1074023](https://doi.org/10.1126/science.1074023).
- 335 **Yang SCH**, Bechhoefer J. How *Xenopus laevis* embryos replicate reliably: investigating the random-completion  
336 problem. *Phys Rev E.* 2008; 78(4):041917.
- 337 **Yang SCH**, Rhind N, Bechhoefer J. Modeling genome-wide replication kinetics reveals a mechanism for regulation  
338 of replication timing. *Mol Syst Biol.* 2010; 6(1):404.
